# Supplementary material
Source: Copernicus journal article supplement (doi:10.5194/egqsj-20-35-1969)
Supplement: Supplementary file 1 [file egqsj-20-35-1969-supplement.zip]

## Paläosoziologische Gliederung fossiler Pollenspektren (Mittelwerte aus den Tabellen in MENKE 1968).

| Spektren-Gruppe     | a) Gehölz-Sp. |              | b) Heide-Sp. |            | c) Ried-Sp.   |                |              |             |             | d) Farn-Sp. | e) Röhricht.-Sp. |              |             |              | f) Brackton |
|---------------------|---------------|--------------|--------------|------------|---------------|----------------|--------------|-------------|-------------|-------------|------------------|--------------|-------------|--------------|-------------|
| Form                | 1. Alnus-F.   | 2. Betula-F. | 1. Reine F.  | 2. Pot.-F. | 1. Sphagn.-F. | 2. Ophiogl.-F. | 3. Filip.-F. | 4. Reine F. | 5. Meny.-F. |             | 1. Clad. F.      | 2. Typha. F. | 3. Reine F. | 4. Scirp. F. |             |
| Petrographie        | Hl            | Hl/Hs        | Hs           | Hs         | Hp            | Hp/c           | Hp/Hpt       | Hp/(t)      | Hs/Hb       | H/Hc        | Hp               | Hpt          | Hp,Hpt      | Hpt          | Tu          |
| Foraminif.          | -             | -            | -            | -          | -             | +              | -            | (+)         | -           | -           | ++               | +            | ++          | +++          | +++         |
| Hystrich.           | -             | -            | -            | -          | -             | +              | +            | (+)         | -           | (-)         | ++               | +            | ++          | ++           | +++         |
| Anuli               | -             | -            | -            | -          | +             | -              | -            | +           | -           | +++         | (+)              | (+)          | -           | -            | -           |
| Alnus               | 76,2          | 16,4         | 40,5         | 42,2       | 38,5          | 29,4           | 52,2         | 36,1        | 25,1        | 39,6        | 30,8             | 25,6         | 29,3        | 27,7         | 27,1        |
| Betula              | 3,0           | 68,0         | 17,5         | 14,8       | 14,3          | 17,4           | 9,1          | 12,3        | 20,1        | 14,9        | 14,3             | 13,4         | 10,8        | 10,7         | 13,0        |
| Pinus               | 4,2           | 0,9          | 5,0          | 7,5        | 5,1           | 8,6            | 7,8          | 7,4         | 14,0        | 11,3        | 7,8              | 16,4         | 8,8         | 10,1         | 22,9        |
| EMW s. l.           | 16,4          | 16,7         | 36,9         | 35,2       | 41,8          | 45,8           | 30,9         | 44,0        | 39,9        | 33,9        | 46,8             | 44,1         | 50,7        | 51,4         | 38,4        |
| Σ NBP               | 14            | 20           | 142          | 207        | 211           | 526            | 94           | 180         | 123         | 52          | 61               | 127          | 126         | 164          | 47          |
| Σ Pteridophyta      | 5             | 2            | 5            | 6          | 28            | 27             | 57           | 74          | 27          | 410         | 33               | 15           | 4           | 5            | 9           |
| Sphagnum            | +             | 14           | 25           | 37         | 66            | 1              | 2            | 1           | 3           | 1           | 1                | +            | +           | 1            | 3           |
| Salix               | 0,5           | -            | +            | 0,3        | 0,8           | 0,7            | 0,8          | 0,4         | 0,8         | 0,5         | 0,5              | 0,6          | 0,3         | 0,4          | 0,6         |
| Frangula            | 0,2           | -            | -            | -          | +             | +              | 2,1          | 0,2         | -           | -           | -                | -            | -           | -            | -           |
| Myrica              | -             | V            | V            | (V?)       | V             | V              | V?           | V           | V           | V?          | -                | -            | -           | -            | -           |
| Chenopod.           | 3,7           | 0,4          | 0,4          | 1,2        | 0,6           | 1,7            | 1,8          | 1,8         | 0,9         | 0,4         | 1,9              | 4,3          | 4,6         | 4,9          | 17,4        |
| Gram. W.T.          | 23,7          | 57,2         | 19,2         | 57,1       | 66,0          | 55,9           | 23,8         | 51,2        | 32,9        | 7,7         | 45,9             | 50,3         | 78,4        | 60,8         | 47,1        |
| Cyperac. (o. Clad.) | 24,0          | 21,2         | 16,0         | 6,3        | 3,3           | 15,6           | 24,0         | 4,4         | 26,1        | 4,5         | 4,4              | 8,6          | 7,7         | 25,9         | 6,3         |
| Dryopt.-Typ         | 16,5          | 9,4          | 2,9          | 2,2        | 11,1          | 3,2            | 31,6         | 26,0        | 13,9        | 84,1        | 16,2             | 8,4          | 2,5         | 2,6          | 12,4        |
| Calluna             | 0,9           | 1,7          | 56,4         | 19,9       | 2,4           | 0,3            | 1,3          | 0,7         | 6,6         | 0,4         | 1,1              | 1,3          | 0,5         | 0,5          | 5,8         |
| übr. Eric.          | -             | -            | 0,6          | 0,3        | -             | -              | -            | -           | 0,1         | +           | -                | -            | 0,1         | -            | 0,2         |
| Empetrum            | -             | -            | 0,1          | 7,4        | 0,2           | +              | +            | -           | 0,1         | -           | -                | -            | -           | +            | 0,1         |
| Rumex ac.           | 0,1           | 1,1          | 0,7          | 0,2        | 5,9           | 1,2            | 0,8          | 2,3         | 2,8         | 0,2         | 0,6              | 0,1          | 0,1         | 0,1          | 0,3         |
| Lotus               | -             | -            | -            | -          | 5,1           | 9,8            | 0,6          | 3,4         | +           | +           | -                | -            | -           | -            | -           |
| Filipendula         | 0,4           | -            | 0,1          | 0,2        | 0,2           | 1,4            | 7,4          | 0,2         | 0,2         | +           | 0,1              | 0,1          | 0,2         | 0,2          | 0,1         |
| Vicia-Lath.         | -             | -            | -            | -          | -             | 0,6            | -            | 0,1         | -           | +           | -                | -            | 0,1         | -            | -           |
| cf. Lychnis         | -             | -            | -            | -          | 0,4           | 0,1            | 0,1          | 0,7         | 1,4         | 0,1         | -                | 0,2          | -           | 0,1          | -           |
| Valeriana           | -             | -            | -            | -          | +             | 0,6            | 0,1          | -           | -           | -           | -                | -            | -           | -            | -           |
| Thalictrum          | -             | 0,2          | -            | +          | +             | 0,4            | -            | +           | 0,1         | -           | -                | -            | -           | +            | -           |
| Cirsium-Typ         | -             | -            | -            | -          | 0,1           | 0,1            | -            | 0,2         | -           | -           | -                | -            | -           | -            | -           |
| Ophioglossum        | -             | -            | -            | +          | +             | 3,3            | -            | -           | 0,1         | -           | -                | -            | -           | -            | -           |
| Sanguis. offici.    | -             | -            | -            | -          | 1,1           | -              | -            | -           | -           | -           | -                | -            | -           | -            | -           |
| Hydrocotyle         | -             | -            | -            | -          | 0,3           | 0,1            | -            | -           | -           | +           | -                | -            | -           | -            | -           |
| Gruppenanteil       | 0,5           | 1,3          | 0,8          | 0,4        | 12,0          | 18,7           | 9,0          | 6,9         | 4,6         | 0,3         | 0,7              | 0,4          | 0,4         | 0,4          | 0,4         |
| Lysimachia          | -             | -            | -            | 0,5        | 0,2           | 0,5            | 0,1          | 1,0         | -           | +           | -                | +            | +           | +            | -           |
| Potentilla-Typ      | -             | -            | -            | 0,6        | 0,1           | 0,1            | -            | +           | 0,4         | -           | -                | -            | -           | -            | -           |
| Gentiana pneum.     | -             | -            | -            | 0,1        | -             | -              | -            | -           | -           | -           | -                | -            | -           | -            | -           |
| Succisa             | -             | -            | -            | 0,1        | -             | -              | -            | -           | -           | -           | -                | -            | -           | -            | -           |
| Gruppenanteil       | -             | -            | -            | 1,3        | 0,3           | 0,6            | 0,1          | 1,0         | 0,4         | -           | -                | -            | -           | -            | -           |
| Menyanthes          | -             | -            | -            | -          | -             | -              | -            | -           | 2,9         | 0,1         | -                | -            | -           | -            | -           |
| Pedicul. pal.-Typ   | -             | -            | -            | -          | -             | +              | -            | -           | 0,4         | -           | -                | -            | -           | -            | -           |
| Caltha              | 1,3           | -            | -            | -          | -             | -              | 0,1          | -           | 3,3         | -           | -                | +            | 0,1         | -            | -           |
| Orchidaceae         | -             | -            | -            | -          | -             | -              | -            | -           | +           | -           | -                | -            | -           | -            | -           |
| Gruppenanteil       | 1,3           | -            | -            | -          | -             | -              | 0,1          | -           | 6,6         | 0,1         | -                | -            | 0,1         | -            | -           |
| Convolv. sepium     | -             | -            | -            | -          | -             | +              | +            | 0,1         | -           | -           | -                | +            | +           | -            | -           |
| Mentha-Lycopus-Typ  | -             | -            | -            | -          | +             | -              | -            | 0,1         | -           | -           | -                | 0,2          | -           | -            | -           |
| Symphytum           | -             | -            | -            | -          | +             | +              | 0,1          | 0,7         | -           | -           | 0,1              | 0,1          | +           | -            | -           |
| Solanum dulcamara   | 6,3           | -            | -            | -          | -             | -              | -            | +           | -           | -           | -                | 0,3          | -           | -            | -           |
| Typha angust.       | 0,2           | 1,8          | 0,2          | 0,6        | 0,3           | 0,2            | 1,0          | 1,7         | 0,3         | 0,2         | 3,7              | 13,6         | 0,6         | 1,2          | 2,5         |
| Typha latifolia     | -             | 1,1          | 0,1          | 0,1        | 0,1           | +              | 0,5          | 0,1         | -           | +           | +                | 3,9          | 0,1         | -            | 0,4         |
| Cladium             | 0,2           | -            | +            | -          | +             | -              | -            | 0,1         | -           | 0,1         | 16,4             | -            | -           | -            | -           |
| Rumex hydrolap.     | -             | -            | -            | -          | -             | -              | -            | -           | -           | -           | 0,3              | 0,5          | 0,1         | -            | -           |
| Sparganium ram.     | -             | -            | +            | -          | -             | -              | -            | -           | 0,1         | -           | -                | 0,9          | -           | -            | -           |
| Berula-Sium-Typ     | -             | -            | -            | -          | -             | -              | -            | -           | -           | -           | 1,2              | 0,1          | -           | -            | -           |
| Gruppenanteil       | 0,4           | 2,9          | 0,3          | 0,7        | 0,4           | 0,2            | 1,5          | 1,9         | 0,4         | 0,3         | 21,6             | 19,0         | 0,8         | 1,2          | 3,0         |
| Cruciferae          | 5,0           | -            | -            | -          | -             | -              | -            | -           | 0,9         | 0,2         | 0,2              | +            | +           | -            | -           |
| Urtica/Humulus      | 2,2           | -            | 0,2          | -          | 0,1           | 0,1            | 0,7          | 0,1         | -           | -           | +                | 0,1          | +           | +            | 0,5         |
| Melampyrum          | +             | 2,0          | -            | -          | -             | 0,1            | +            | +           | 0,5         | -           | -                | -            | +           | -            | -           |
| Umbelliferae        | 1,1           | 0,2          | 0,1          | 0,1        | 0,4           | 1,6            | 1,2          | 0,8         | 0,8         | 0,1         | 0,2              | 1,7          | +           | 0,2          | 0,3         |
| Tubuliflorae        | 1,7           | 0,2          | 0,1          | 0,5        | 0,2           | 0,6            | 0,3          | 0,8         | 0,3         | 0,1         | 0,7              | 1,8          | 0,4         | 1,7          | 0,6         |
| Rubiaceae           | 0,5           | 0,4          | 0,1          | +          | 0,2           | 0,2            | 0,7          | 1,0         | 0,9         | 0,2         | 0,3              | 1,6          | 1,2         | 0,3          | -           |
| Lythrum             | -             | -            | +            | -          | 0,2           | 0,1            | +            | 0,3         | -           | +           | 0,5              | 0,4          | 1,6         | 0,1          | -           |
| Varia indetermin.   | 0,9           | 0,3          | 0,1          | 0,3        | 0,3           | 0,4            | 1,0          | 0,3         | 0,7         | +           | 0,7              | 0,4          | 0,2         | 0,3          | 0,8         |
