# Supplementary material
Source: Copernicus journal article supplement (doi:10.5194/egqsj-20-35-1969)
Supplement: Supplementary file 2 [file egqsj-20-35-1969-supplement.zip]

The profile shows the following layers and features:

- Top Layer:** PINUS, BETULA, ALNUS, QUERCUS, FAGUS, CARPINUS, ULMUS, TILIA, FRAXINUS, GETREIDE-TYP, PLANTAGO LANG., CORYLUS (bezogen auf  $\pm$ BP).
- Substrate:** DELVE-(D-) 92, BRAAKEN-(Bra-) 1, BERGWÖHRDEN-OST (B.O.), Bra-1, D-92, B.O., W.M., WILDES MOOR (WM).
- Geological Zones:** Atlantikum, Subboreal, Subatlantikum.
- Stratigraphic Units:** VII, VIII, IX, 8, 9a, 9b, 10a, 10b, 11.
- Radiocarbon Dates:**
  - HV 639:  $4350 \pm 85$  a v. Chr. (HV 623 D-122:  $4000 \pm 120$  a v. Chr.)
  - HV 637:  $3680 \pm 275$  a v. Chr.
  - HV 625:  $2915 \pm 156$  a v. Chr. (HV 615 D-122:  $2815 \pm 100$  a v. Chr.)
  - HV 624:  $2150 \pm 65$  a v. Chr.
  - HV 1443:  $1710 \pm 65$  a v. Chr.
  - HV 1444:  $1675 \pm 65$  a v. Chr.
  - HV 765:  $1680 \pm 100$  a v. Chr.
  - HV 768:  $60 \pm 65$  a v. Chr.
  - HV 576:  $215 \pm 65$  a v. Chr.
  - HV 1441:  $435 \pm 80$  a v. Chr.
  - HV 237 Hus-SS:  $560 \pm 80$  a v. Chr.
  - HV 237 Hus-SS:  $570 \pm 90$  a v. Chr.
- Other Features:** MYRICA, SECALE, C3, C3d, C4, C5, C5d, C6, C6d, C7, C7d, C8, C8d, C9, C9d, C10, C10d, C11, C11d, C12, C12d, C13, C13d, C14, C14d, C15, C15d, C16, C16d, C17, C17d, C18, C18d, C19, C19d, C20, C20d, C21, C21d, C22, C22d, C23, C23d, C24, C24d, C25, C25d, C26, C26d, C27, C27d, C28, C28d, C29, C29d, C30, C30d, C31, C31d, C32, C32d, C33, C33d, C34, C34d, C35, C35d, C36, C36d, C37, C37d, C38, C38d, C39, C39d, C40, C40d, C41, C41d, C42, C42d, C43, C43d, C44, C44d, C45, C45d, C46, C46d, C47, C47d, C48, C48d, C49, C49d, C50, C50d, C51, C51d, C52, C52d, C53, C53d, C54, C54d, C55, C55d, C56, C56d, C57, C57d, C58, C58d, C59, C59d, C60, C60d, C61, C61d, C62, C62d, C63, C63d, C64, C64d, C65, C65d, C66, C66d, C67, C67d, C68, C68d, C69, C69d, C70, C70d, C71, C71d, C72, C72d, C73, C73d, C74, C74d, C75, C75d, C76, C76d, C77, C77d, C78, C78d, C79, C79d, C80, C80d, C81, C81d, C82, C82d, C83, C83d, C84, C84d, C85, C85d, C86, C86d, C87, C87d, C88, C88d, C89, C89d, C90, C90d, C91, C91d, C92, C92d, C93, C93d, C94, C94d, C95, C95d, C96, C96d, C97, C97d, C98, C98d, C99, C99d, C100, C100d, C101, C101d, C102, C102d, C103, C103d, C104, C104d, C105, C105d, C106, C106d, C107, C107d, C108, C108d, C109, C109d, C110, C110d, C111, C111d, C112, C112d, C113, C113d, C114, C114d, C115, C115d, C116, C116d, C117, C117d, C118, C118d, C119, C119d, C120, C120d, C121, C121d, C122, C122d, C123, C123d, C124, C124d, C125, C125d, C126, C126d, C127, C127d, C128, C128d, C129, C129d, C130, C130d, C131, C131d, C132, C132d, C133, C133d, C134, C134d, C135, C135d, C136, C136d, C137, C137d, C138, C138d, C139, C139d, C140, C140d, C141, C141d, C142, C142d, C143, C143d, C144, C144d, C145, C145d, C146, C146d, C147, C147d, C148, C148d, C149, C149d, C150, C150d, C151, C151d, C152, C152d, C153, C153d, C154, C154d, C155, C155d, C156, C156d, C157, C157d, C158, C158d, C159, C159d, C160, C160d, C161, C161d, C162, C162d, C163, C163d, C164, C164d, C165, C165d, C166, C166d, C167, C167d, C168, C168d, C169, C169d, C170, C170d, C171, C171d, C172, C172d, C173, C173d, C174, C174d, C175, C175d, C176, C176d, C177, C177d, C178, C178d, C179, C179d, C180, C180d, C181, C181d, C182, C182d, C183, C183d, C184, C184d, C185, C185d, C186, C186d, C187, C187d, C188, C188d, C189, C189d, C190, C190d, C191, C191d, C192, C192d, C193, C193d, C194, C194d, C195, C195d, C196, C196d, C197, C197d, C198, C198d, C199, C199d, C200, C200d, C201, C201d, C202, C202d, C203, C203d, C204, C204d, C205, C205d, C206, C206d, C207, C207d, C208, C208d, C209, C209d, C210, C210d, C211, C211d, C212, C212d, C213, C213d, C214, C214d, C215, C215d, C216, C216d, C217, C217d, C218, C218d, C219, C219d, C220, C220d, C221, C221d, C222, C222d, C223, C223d, C224, C224d, C225, C225d, C226, C226d, C227, C227d, C228, C228d, C229, C229d, C230, C230d, C231, C231d, C232, C232d, C233, C233d, C234, C234d, C235, C235d, C236, C236d, C237, C237d, C238, C238d, C239, C239d, C240, C240d, C241, C241d, C242, C242d, C243, C243d, C244, C244d, C245, C245d, C246, C246d, C247, C247d, C248, C248d, C249, C249d, C250, C250d, C251, C251d, C252, C252d, C253, C253d, C254, C254d, C255, C255d, C256, C256d, C257, C257d, C258, C258d, C259, C259d, C260, C260d, C261, C261d, C262, C262d, C263, C263d, C264, C264d, C265, C265d, C266, C266d, C267, C267d, C268, C268d, C269, C269d, C270, C270d, C271, C271d, C272, C272d, C273, C273d, C274, C274d, C275, C275d, C276, C276d, C277, C277d, C278, C278d, C279, C279d, C280, C280d, C281, C281d, C282, C282d, C283, C283d, C284, C284d, C285, C285d, C286, C286d, C287, C287d, C288, C288d, C289, C289d, C290, C290d, C291, C291d, C292, C292d, C293, C293d, C294, C294d, C295, C295d, C296, C296d, C297, C297d, C298, C298d, C299, C299d, C300, C300d, C301, C301d, C302, C302d, C303, C303d, C304, C304d, C305, C305d, C306, C306d, C307, C307d, C308, C308d, C309, C309d, C310, C310d, C311, C311d, C312, C312d, C313, C313d, C314, C314d, C315, C315d, C316, C316d, C317, C317
